# Supplementary material for: Identification of RHOBTB2 aberration as an independent prognostic indicator in acute myeloid leukemia
Source: publisher site journal article supplement (doi:10.18632/aging.203087), 2021-06-01
Supplement: Supplementary file [file aging-v13i11-203087-supplementary-material-SD1.pdf]

**SUPPLEMENTARY FIGURES**

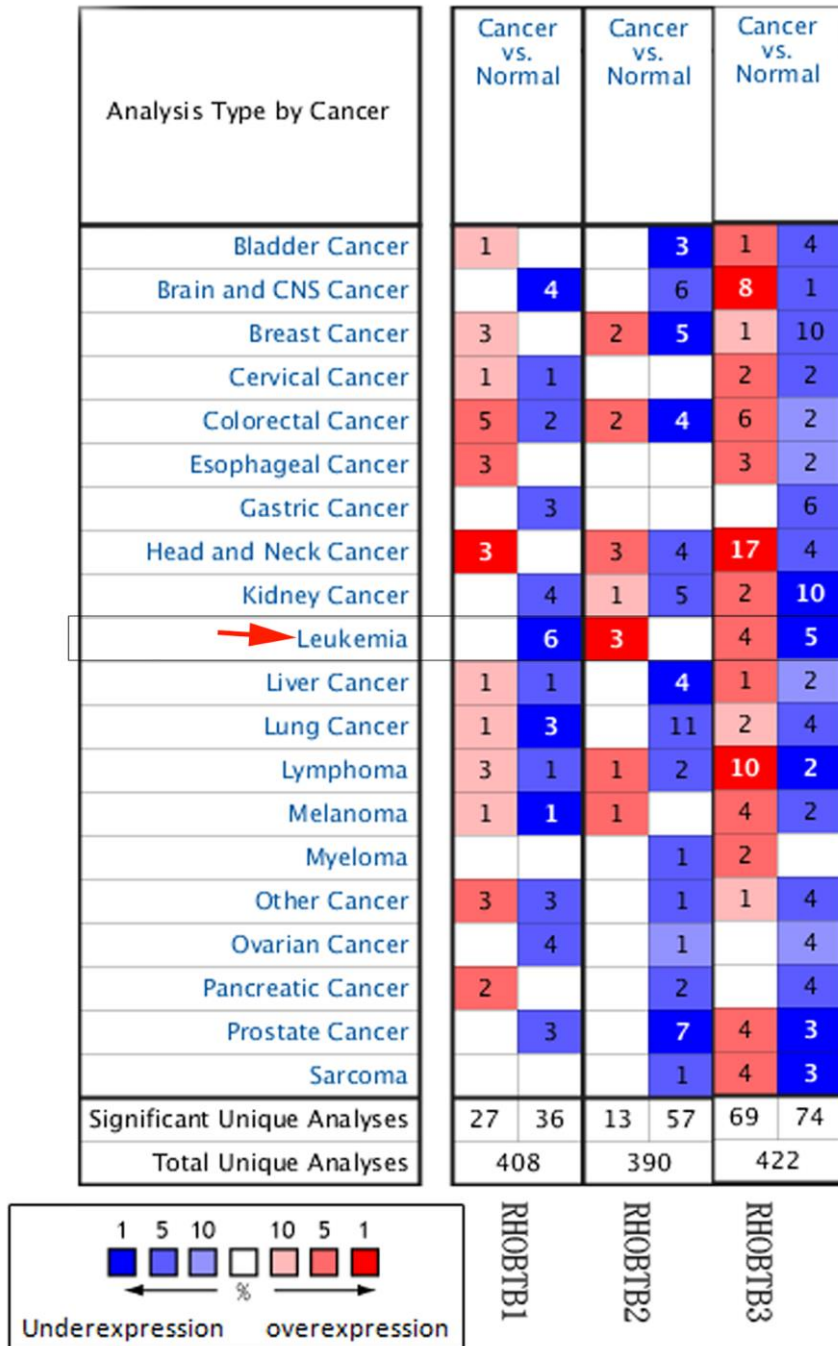

**Supplementary Figure 1. RHOBTB family members transcription levels in human cancers.** The mRNA expression of RHOBTB 1-3 (cancer vs. normal tissue) in pan-cancers was analyzed through the ONCOMINE database. The red arrow indicates RHOBTB expression in AML. The number in the colored cell represents the number of datasets meeting thresholds ( $P < 0.05$ , fold change = ALL). The cell color was defined as the gene rank percentile in the study.

**A** Effect of RHOBTB1 expression level on overall survival in TCGA-LAML cohort

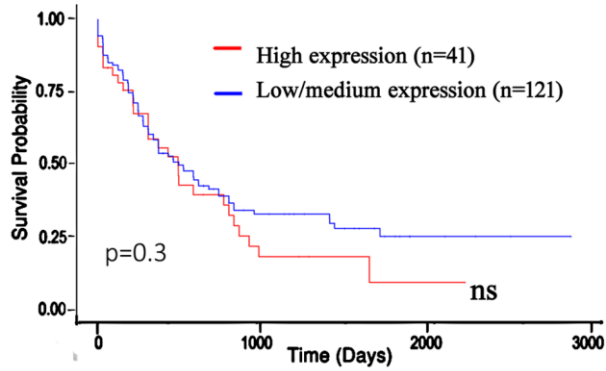

**B** Effect of RHOBTB2 expression level on overall survival in TCGA-LAML cohort

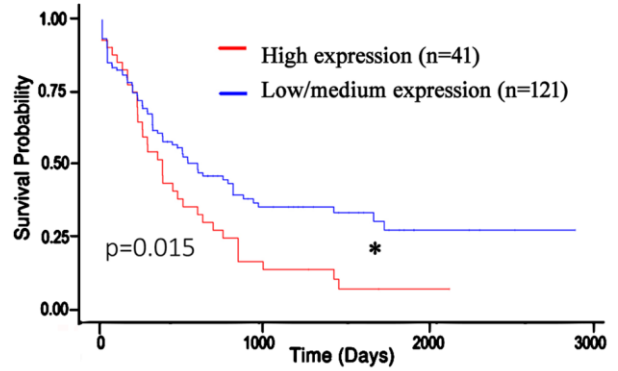

**C** Effect of RHOBTB3 expression level on overall survival in TCGA-LAML cohort

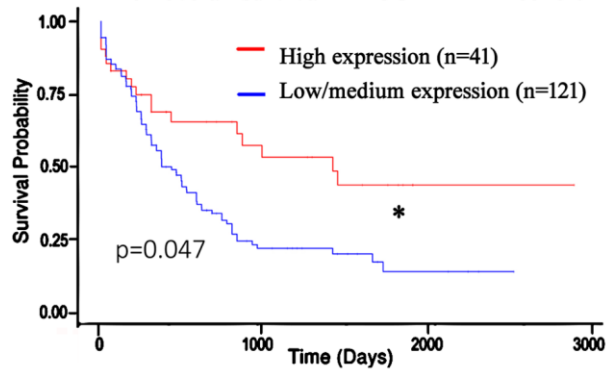

**Supplementary Figure 2. The effect of RHOBTB genes expression level on overall survival of AML patients (UALCAN).** The overall survival (OS) curves of AML patients in different RHOBTB1 (A), RHOBTB2 (B), and RHOBTB3 (C) expression groups were drawn by Kaplan-Meier survival analysis. Patients in the TCGA-LAML cohort were divided into a high expression group ( $n = 41$ ) and a low/medium expression group ( $n = 121$ ) according to the average expression level of each gene. \* $P < 0.05$ .
