# Supplementary material for: Identification of RHOBTB2 aberration as an independent prognostic indicator in acute myeloid leukemia
Source: publisher site journal article supplement (doi:10.18632/aging.203087), 2021-06-01
Supplement: Supplementary file [file aging-v13i11-203087-supplementary-material-SD2.pdf]

## SUPPLEMENTARY TABLE

**Supplementary Table 1. Univariate cox regression of clinicopathological characteristics and selected features with overall survival in a TCGA-LAML cohort.**

| Characteristics                          | HR (95% CI)         | <i>p</i> value |
|------------------------------------------|---------------------|----------------|
| Age (≥60 years old)                      | 2.947 (1.998–4.348) | 5.083e-08***   |
| WBC count (≥30 × 10 <sup>9</sup> /L)     | 1.052 (0.718–1.542) | 0.794          |
| blast cell percentage (bone_marrow)      | 1.003 (0.995–1.011) | 0.444          |
| blast cell percentage (peripheral_blood) | 1.001 (0.995–1.007) | 0.796          |
| RHOBTB2_exp                              | 1.672 (1.285–2.176) | 0.0001***      |
| RHOBTB3_exp                              | 0.741 (0.637–0.862) | 0.0001***      |
| adverse cytogenetic risk                 | 1.622 (1.022–2.573) | 0.040*         |
| FLT3_mutation                            | 1.958 (0.925–4.143) | 0.079          |
| NPM1_mutation                            | 0.752 (0.325–1.739) | 0.505          |
| DNMT3A_mutation                          | 0.938 (0.496–1.774) | 0.845          |
| IDH2_mutation                            | 1.403 (0.565–3.480) | 0.465          |
| IDH1_mutation                            | 1.056 (0.426–2.613) | 0.907          |
| RUNX1_mutation                           | 0.926 (0.462–1.854) | 0.828          |
| TET2_mutation                            | 1.542 (0.376–6.330) | 0.548          |
| TP53_mutation                            | 2.343 (1.193–4.602) | 0.013*         |
| NRAS_mutation                            | 0.618 (0.268–1.422) | 0.258          |
| CEBPA_mutation                           | 0.756 (0.237–2.413) | 0.636          |
| WT1_mutation                             | 1.801 (0.568–5.714) | 0.318          |
| PTPN11_mutation                          | 1.202 (0.295–4.903) | 0.797          |
| KRAS_mutation                            | 1.413 (0.515–3.874) | 0.502          |

\**P* < 0.05. \*\*\**P* < 0.001.
